# Supplementary material for: Ergosterol Is Critical for Sporogenesis in Cryptococcus neoformans
Source: MDPI journal article supplement (doi:10.3390/jof10020106), 2024-01-26
Supplement: s1 [file s1]

**JEC21xJEC20**

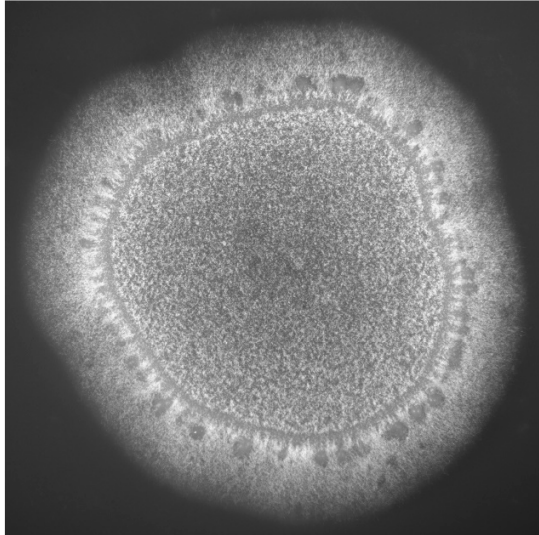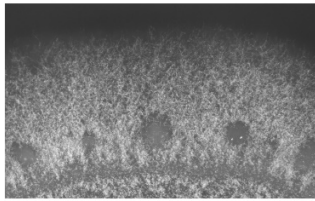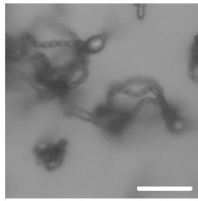

***sre1*ΔxJEC20**

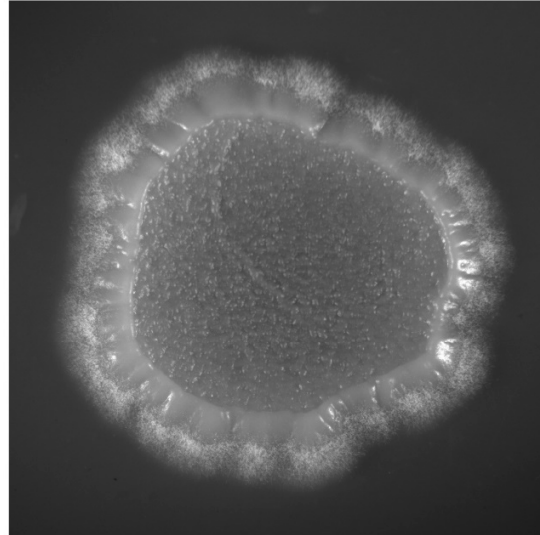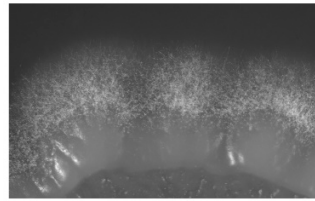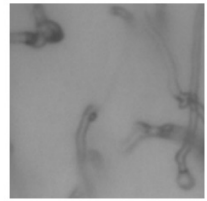

**Supplemental Figure S1:** A wildtype serotype D cross (JEC21 $\alpha$  x JEC20 $\alpha$ ) and a *sre1*Δ unilateral cross (*sre1*Δ $\alpha$  x JEC20 $\alpha$ ) were spotted onto V8 pH=7 agar and incubated at 21°C in the dark for two weeks. The whole colony and colony edge were visualized by a stereoscope and basidia were visualized by light microscopy with a 10x objective. Scale bar = 10  $\mu$ m.

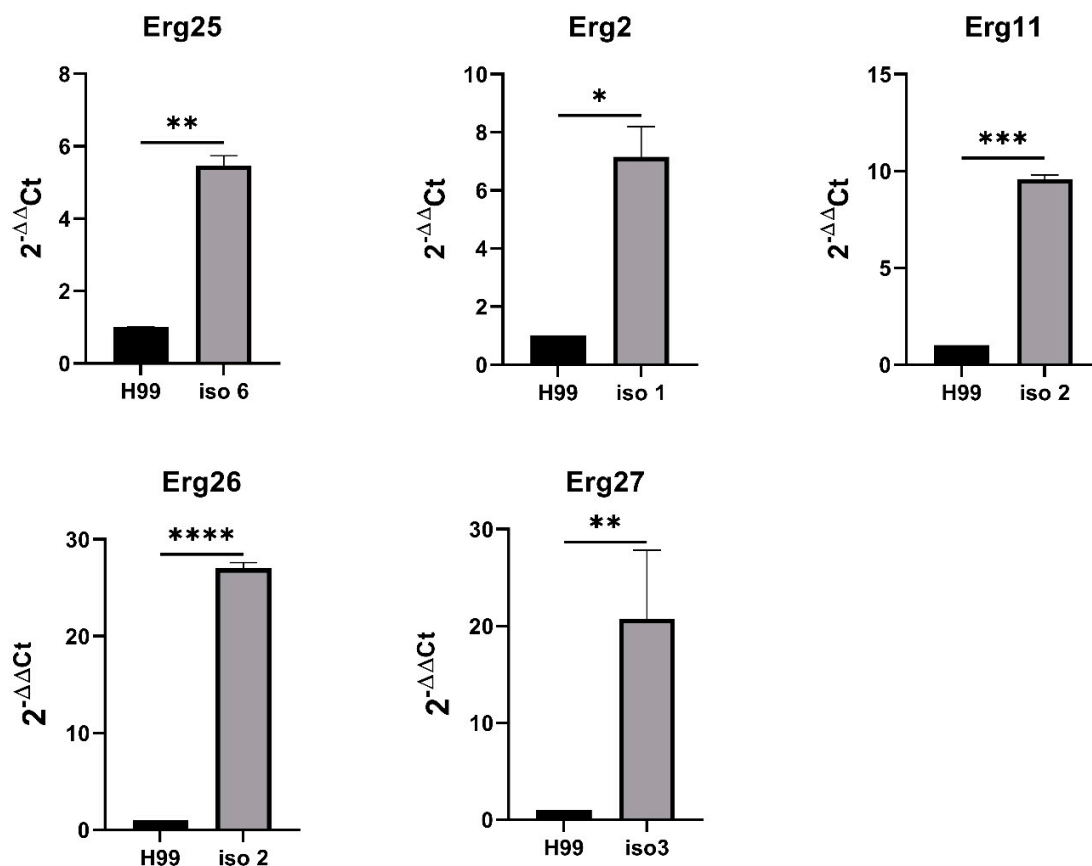

**Supplemental Figure S2:** RT-PCR data was generated by harvesting cells from overnight YPD cultures. Housekeeping gene *TEF1* was used as an internal control to ensure the quality of the original RNA sample used for cDNA amplification and for normalization. Error bars reflect the standard deviation. Student's t-test was used to assess statistical significance. \*:  $P \leq 0.05$ , \*\*:  $P \leq 0.01$ , \*\*\*:  $P \leq 0.001$ , \*\*\*\*:  $P \leq 0.0001$ .
